# Supplementary material for: Flavones Isolated from Scutellariae radix Suppress Propionibacterium Acnes-Induced Cytokine Production In Vitro and In Vivo
Source: PubMed Central journal article supplement (PMC6273464; doi:10.3390/molecules21010015), 2015-12-24
Supplement: molecules-21-00015-s001.pdf [file molecules-21-00015-s001.pdf]

## Supplementary Materials: Flavones Isolated from *Scutellariae radix* Suppress *Propionibacterium acnes*-Induced Cytokine Production *In Vitro* and *In Vivo*

Po-Jung Tsai <sup>1</sup>, Wen-Cheng Huang <sup>1</sup>, Ming-Chi Hsieh <sup>1</sup>, Ping-Jyun Sung <sup>2,3</sup>, Yueh-Hsiung Kuo <sup>4,5,\*</sup> and Wen-Huey Wu <sup>1,\*</sup>

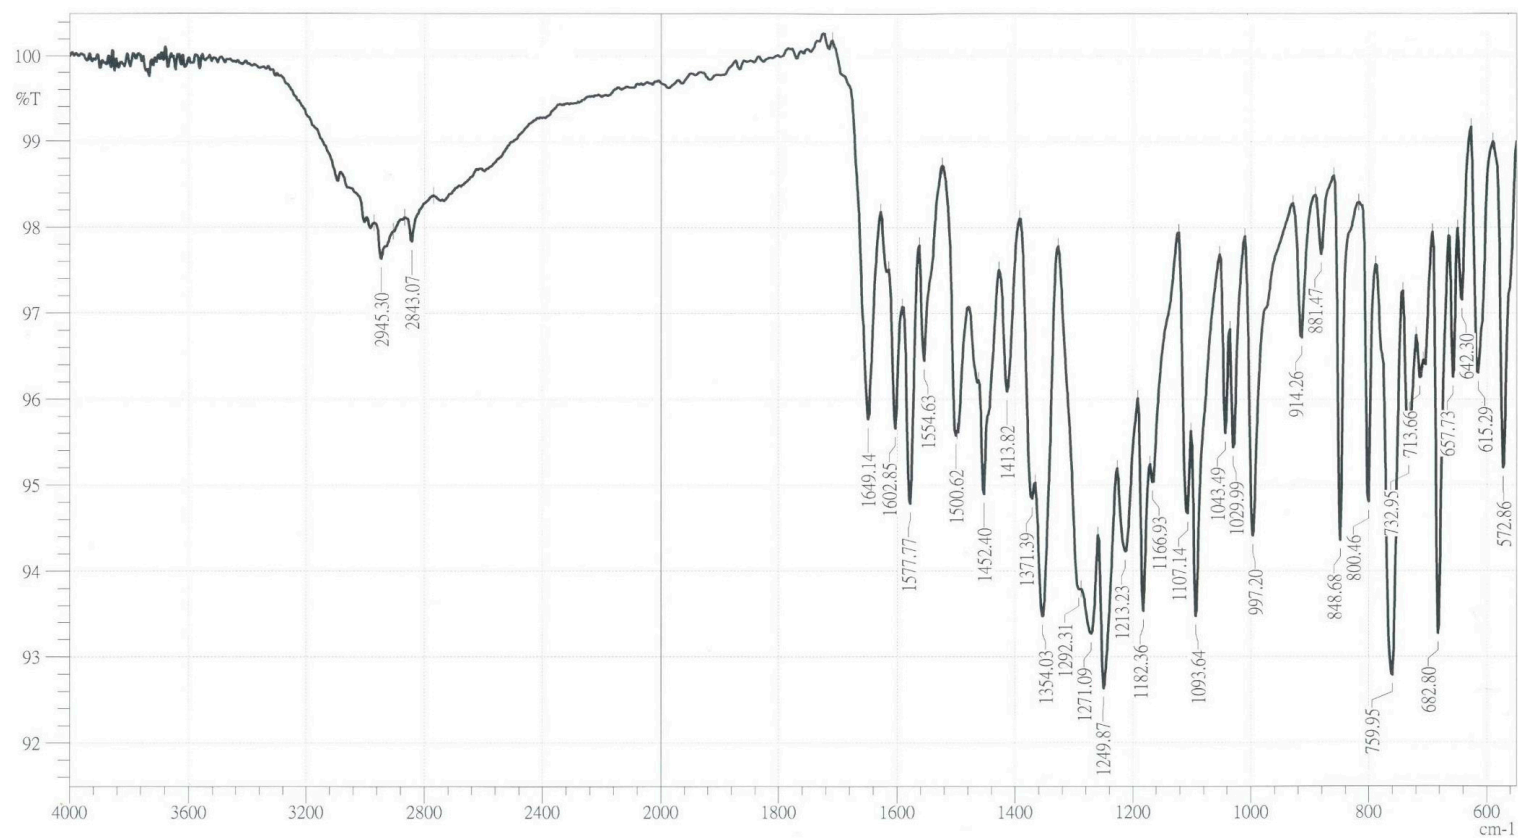

Figure S1. NMR spectrum of FL1.

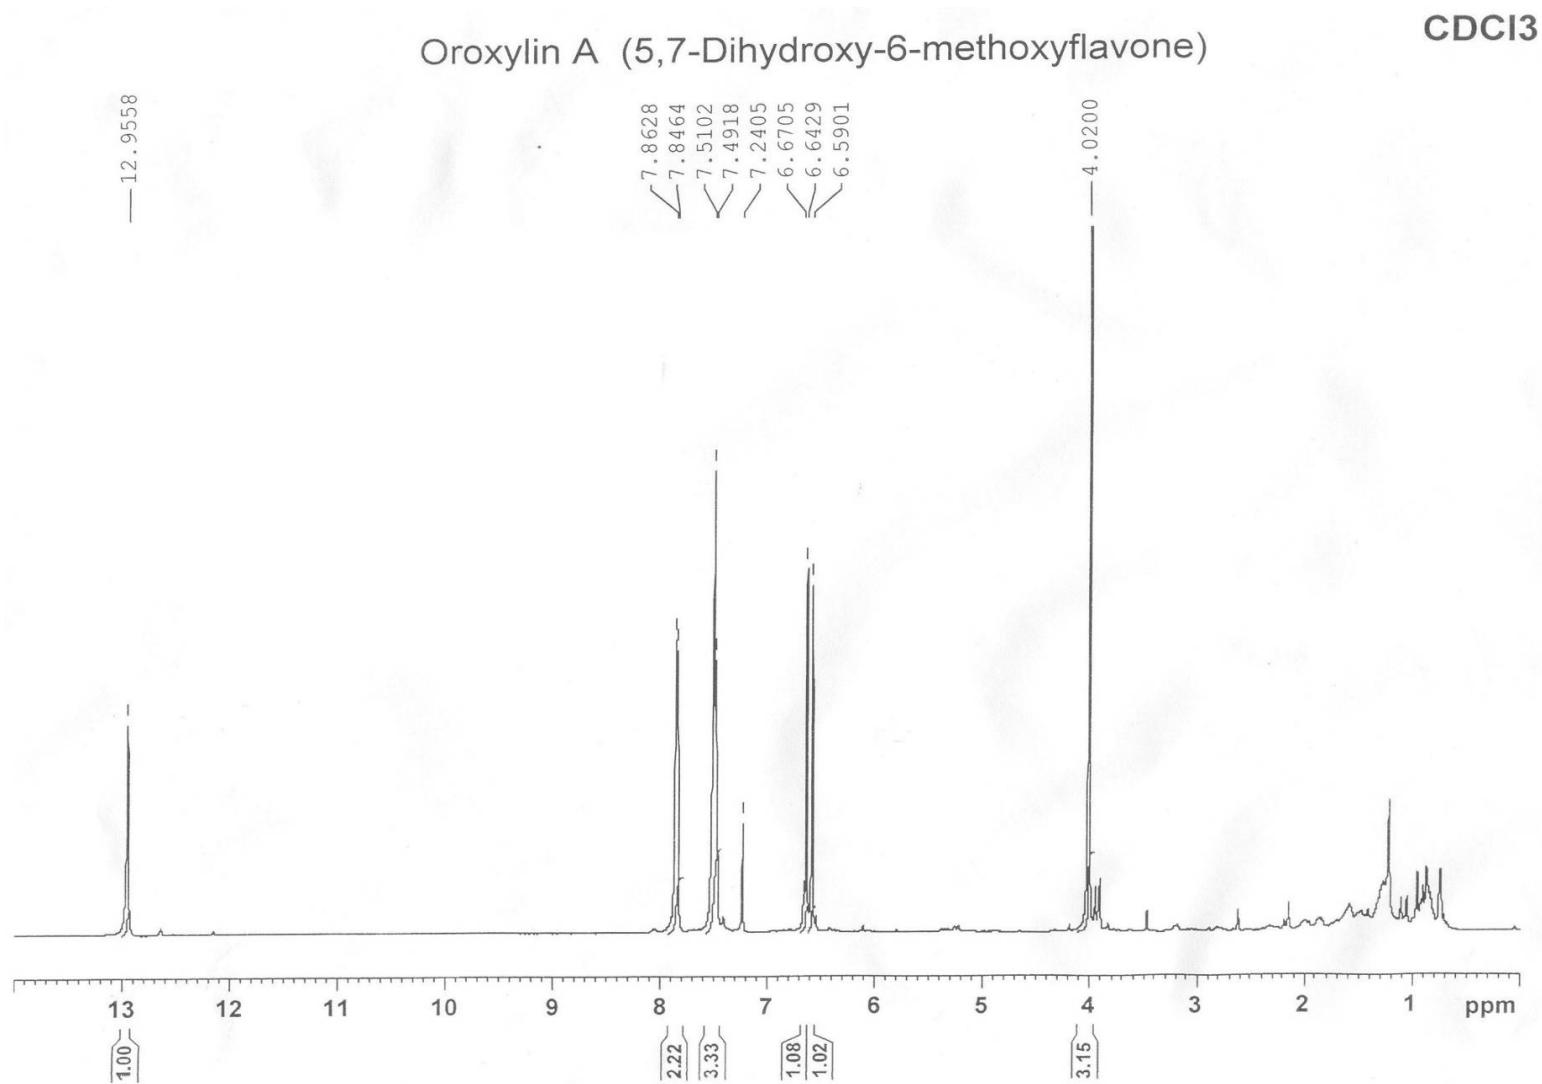

Figure S2. IR spectrum of FL1.

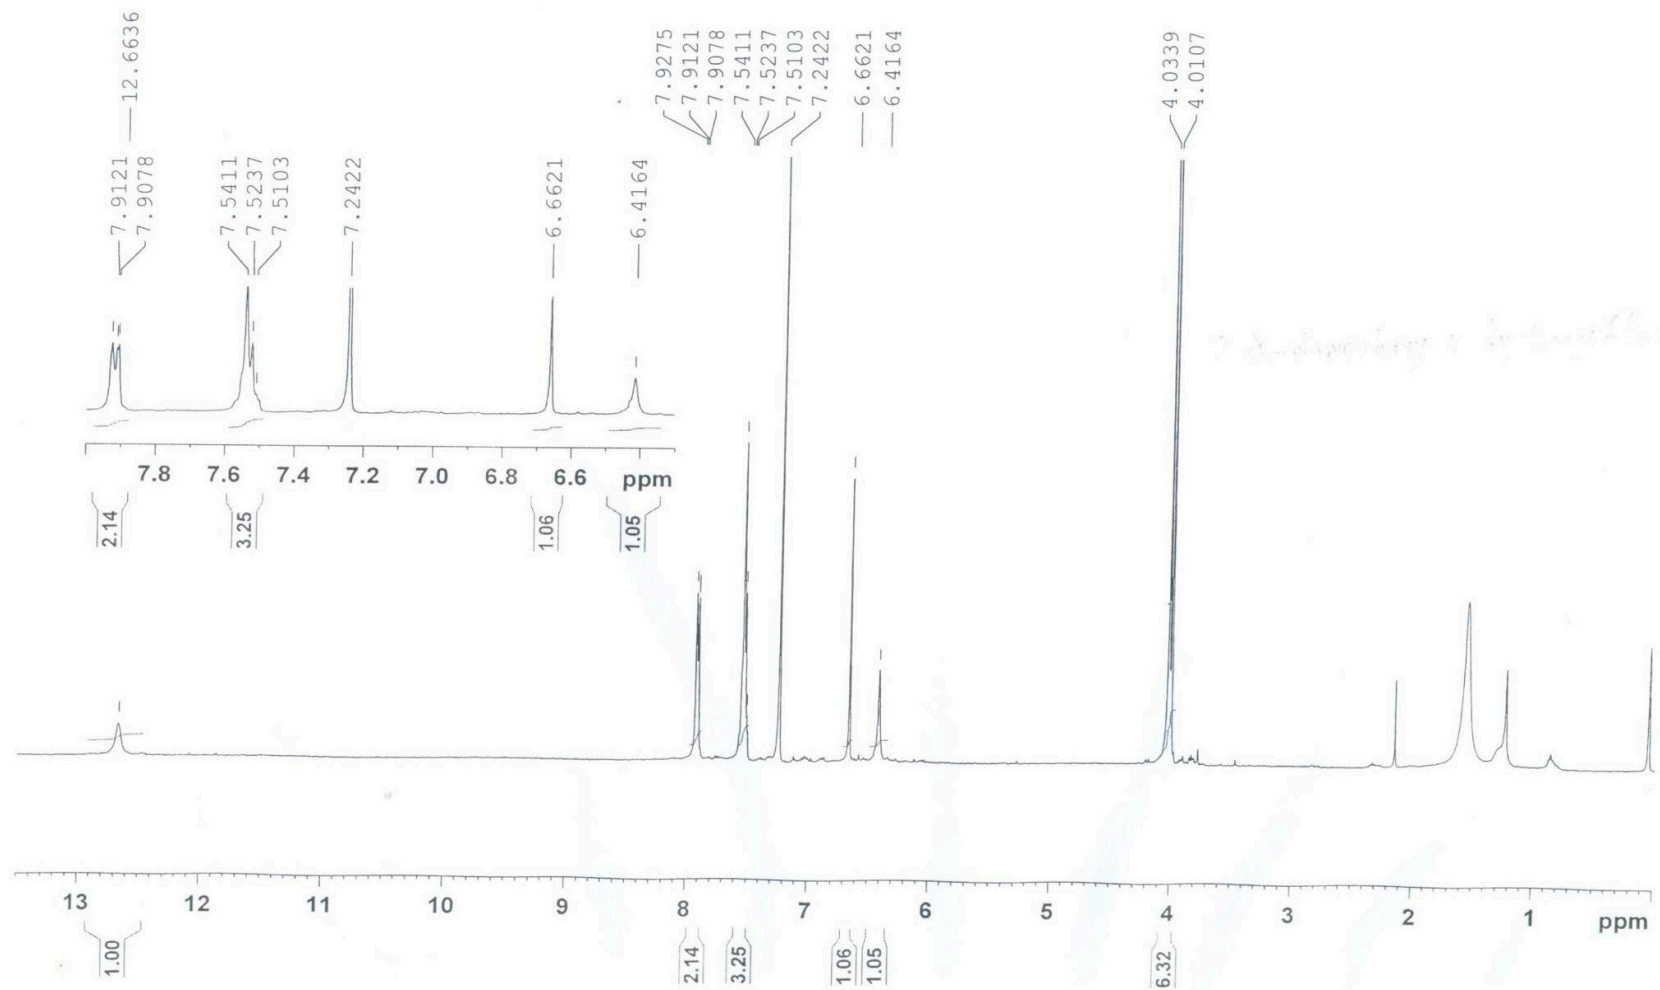

Figure S3. NMR spectrum of FL2.

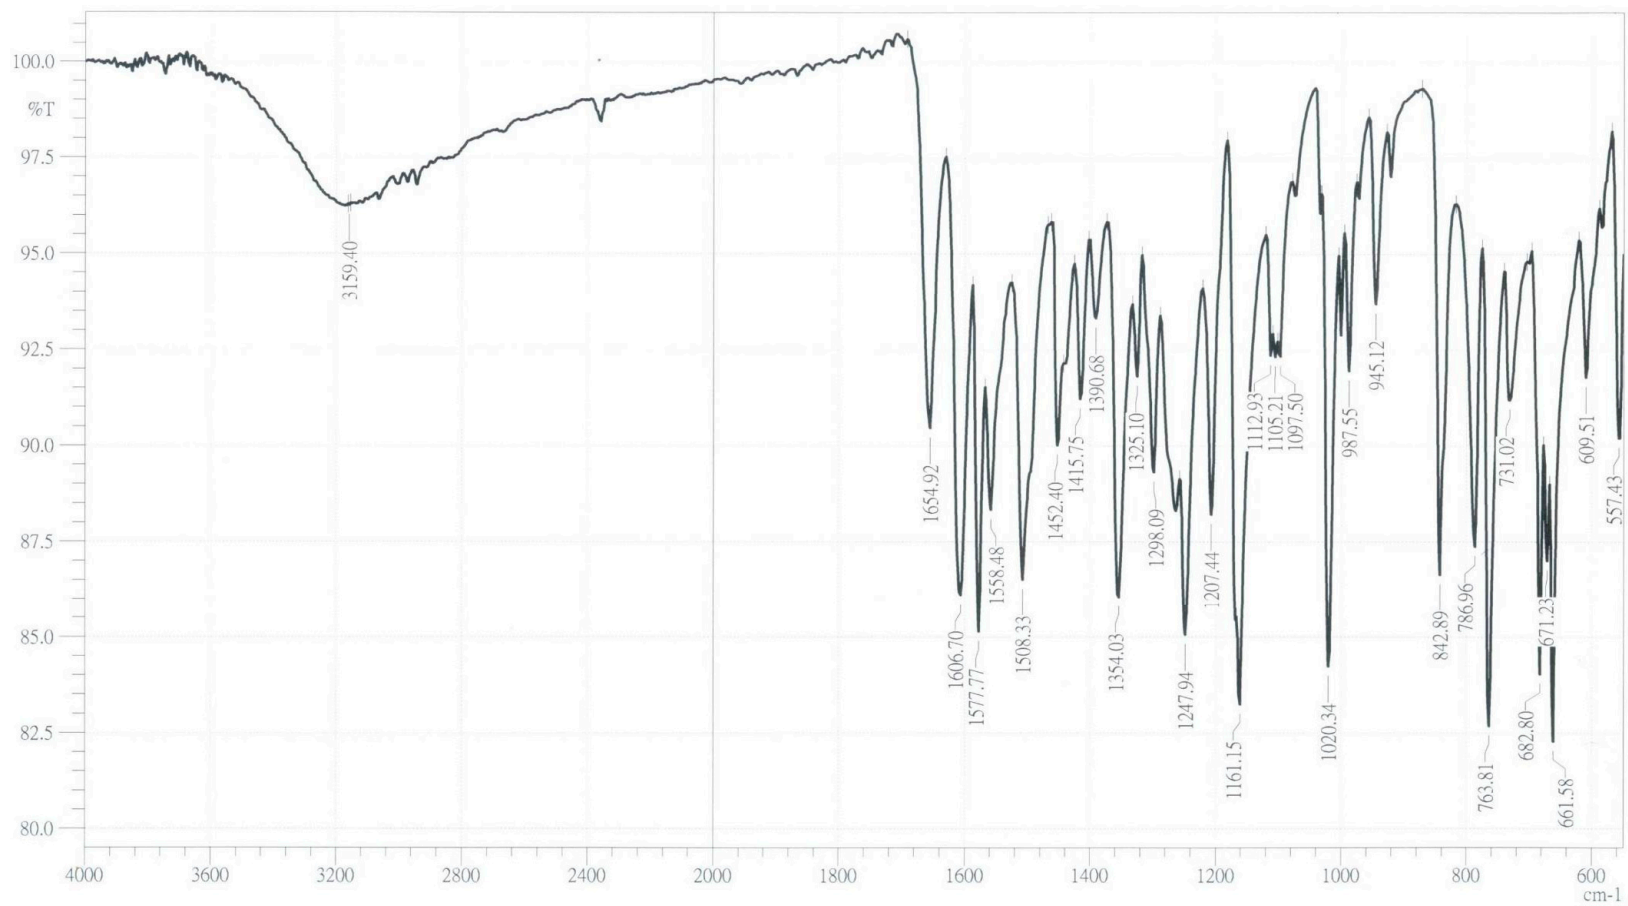

Figure S4. IR spectrum of FL2.

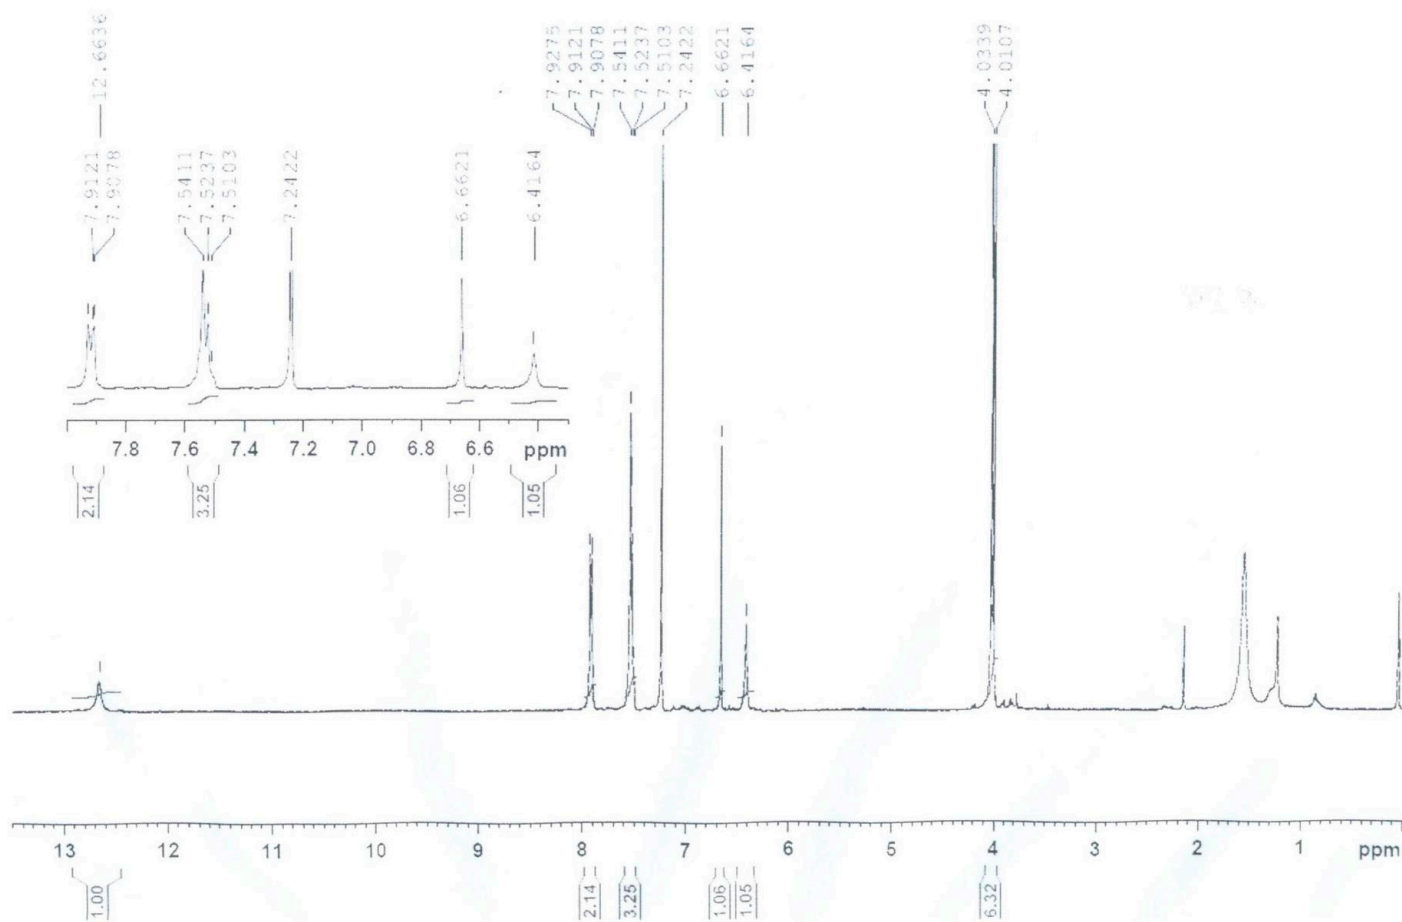

Figure S5. NMR spectrum of FL3.

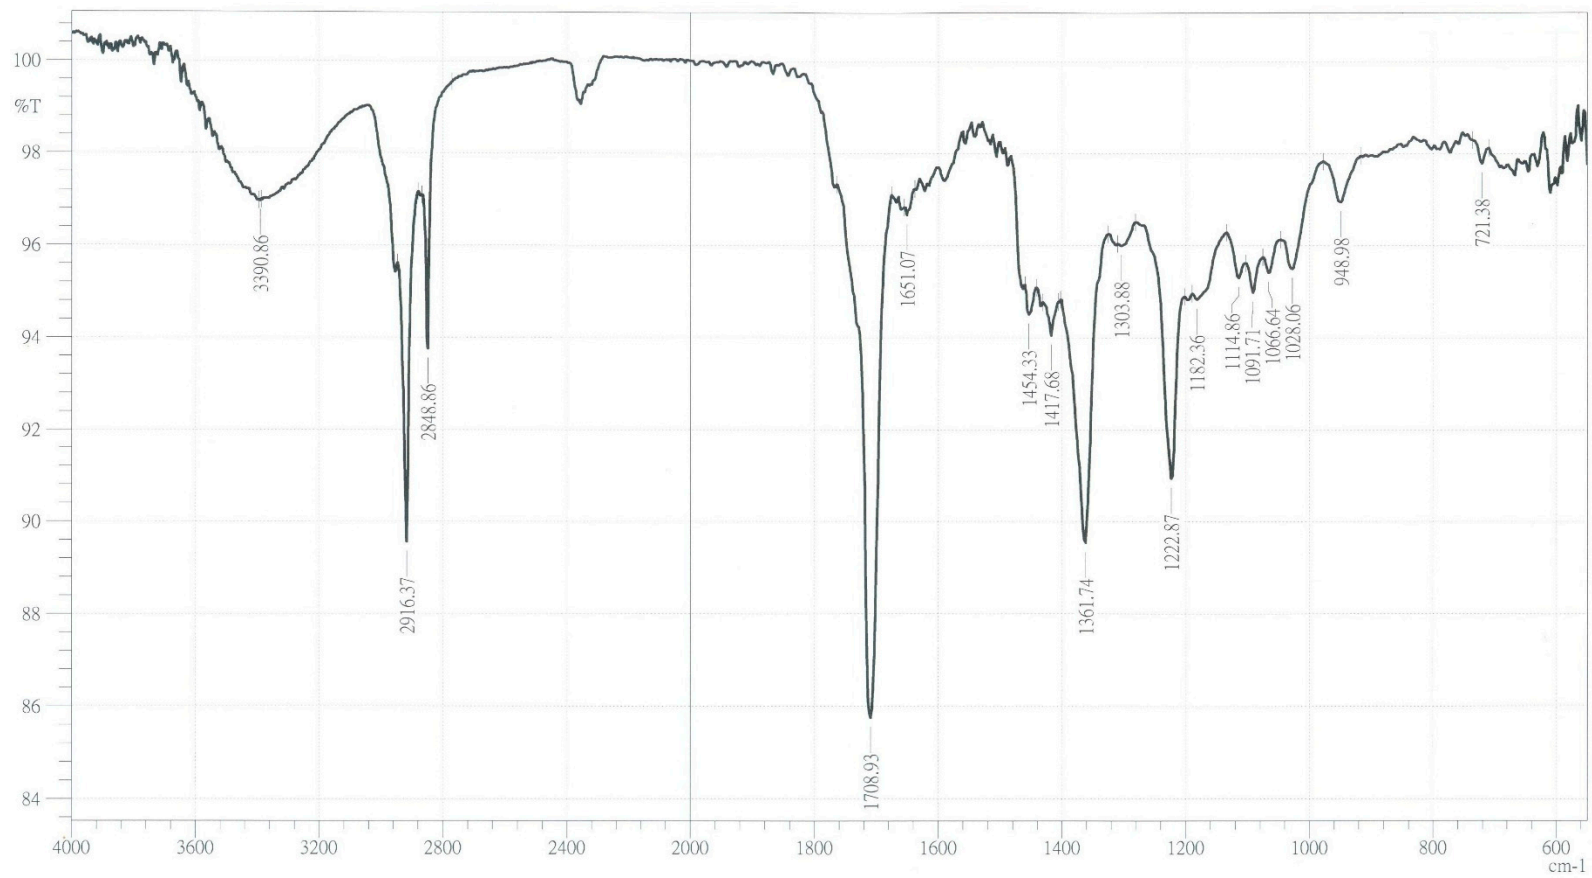

Figure S6. IR spectrum of FL3.

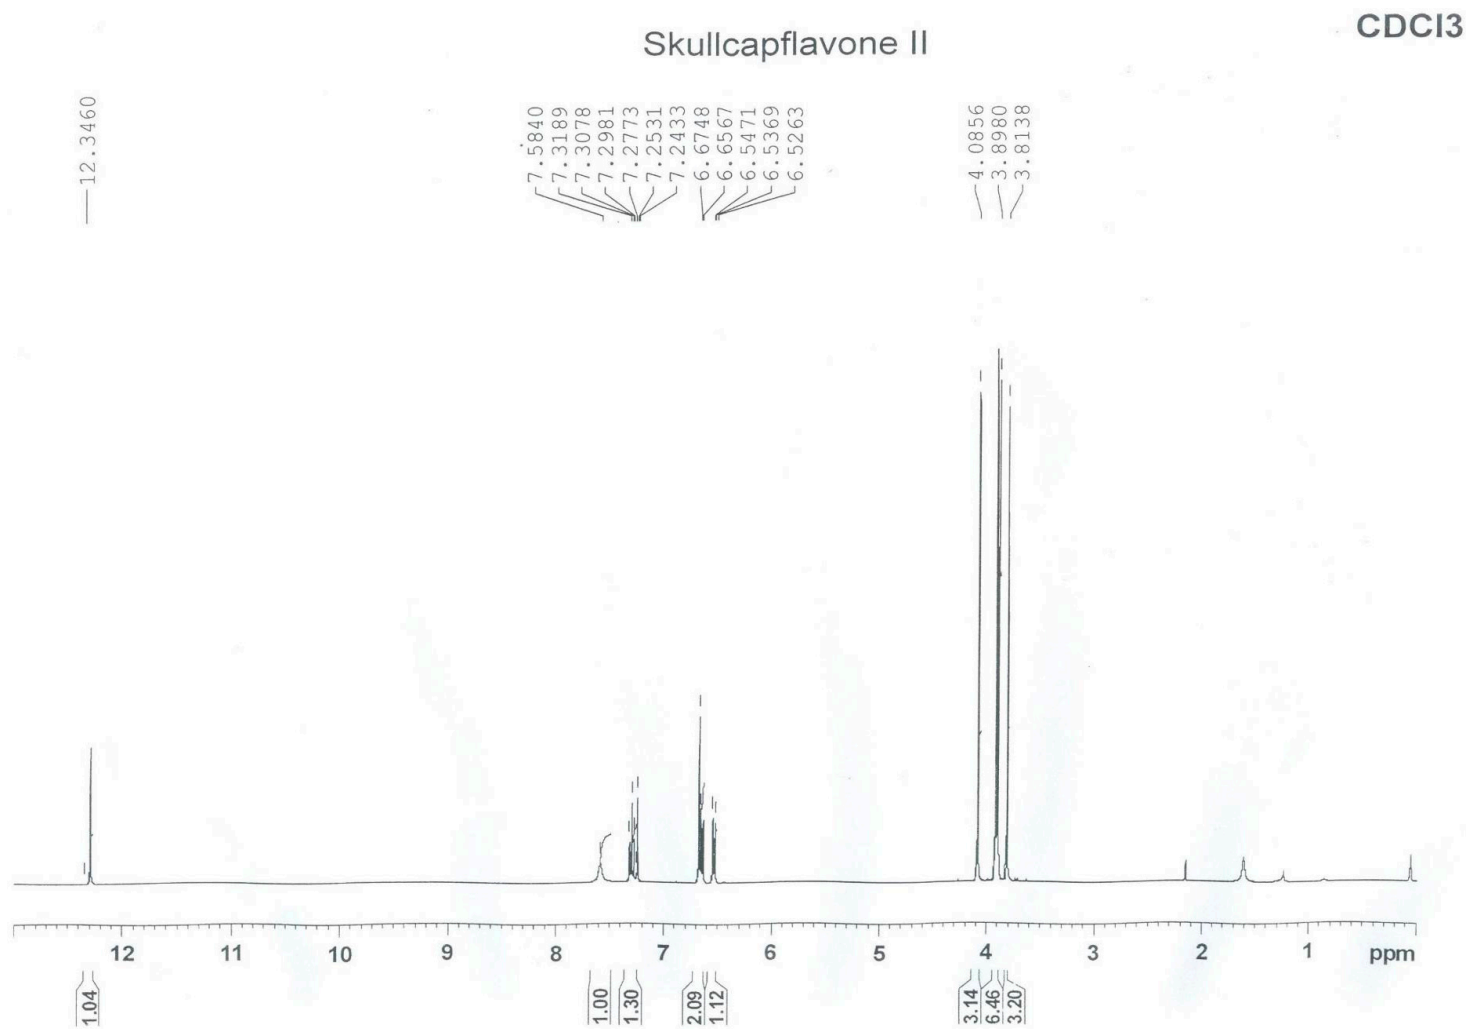

Figure S7. NMR spectrum of FL4.

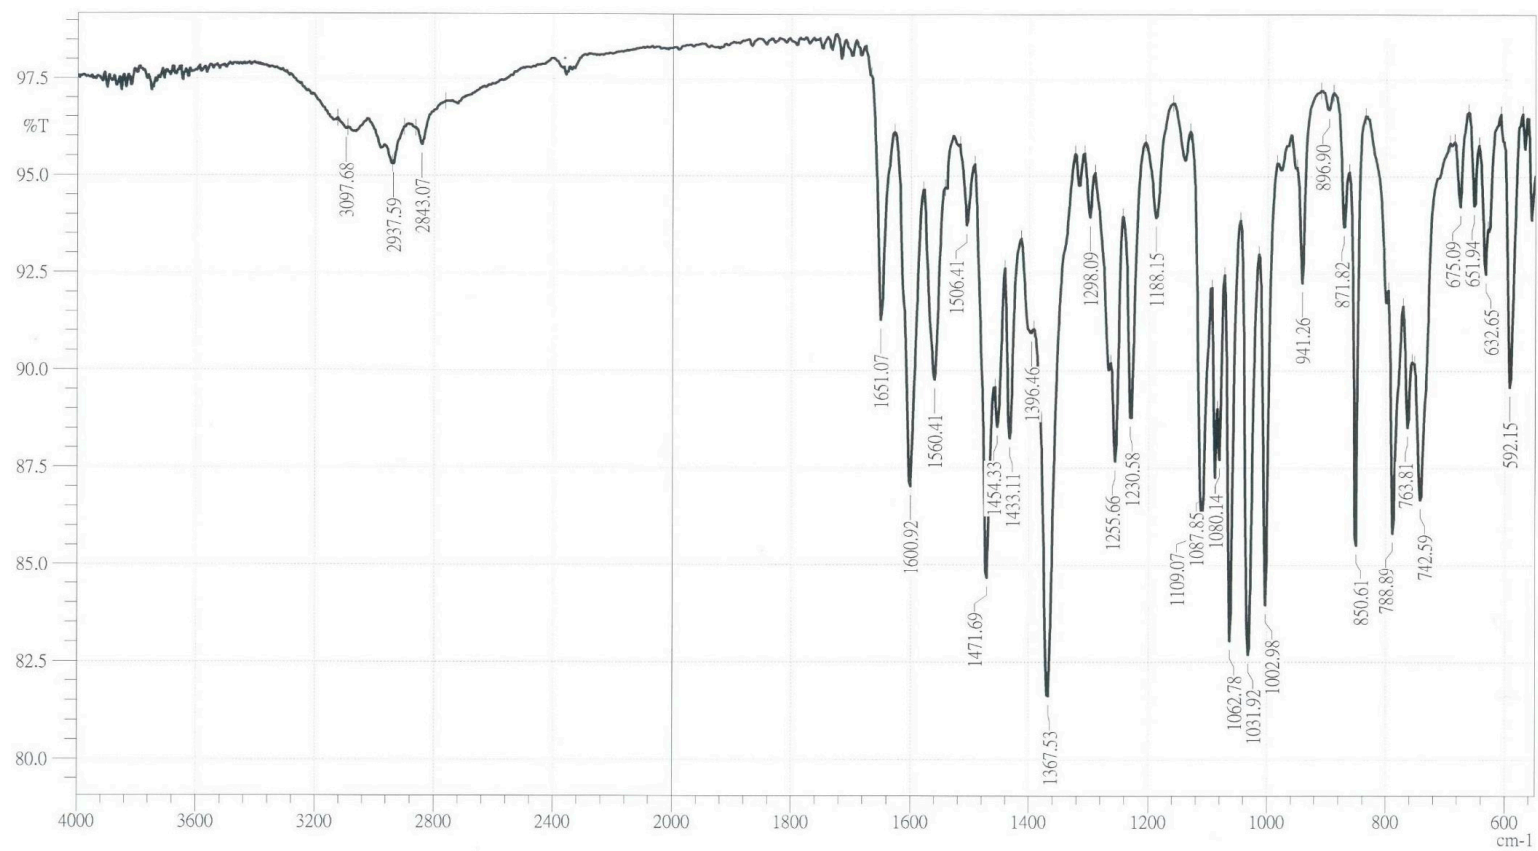

**Figure S8.** IR spectrum of FL4.



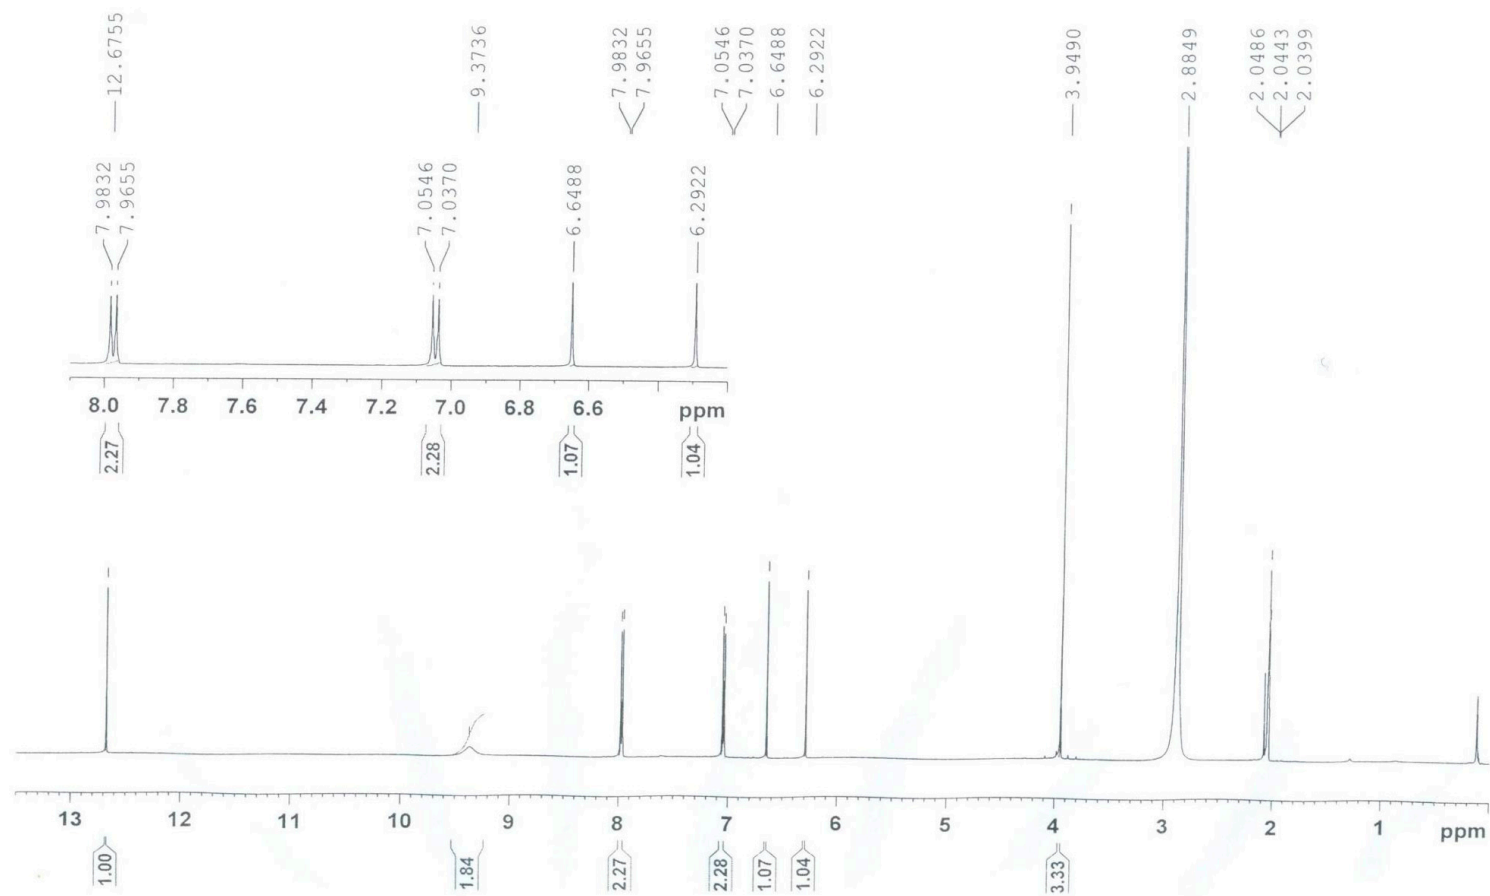

Figure S9. NMR spectrum of FL5.

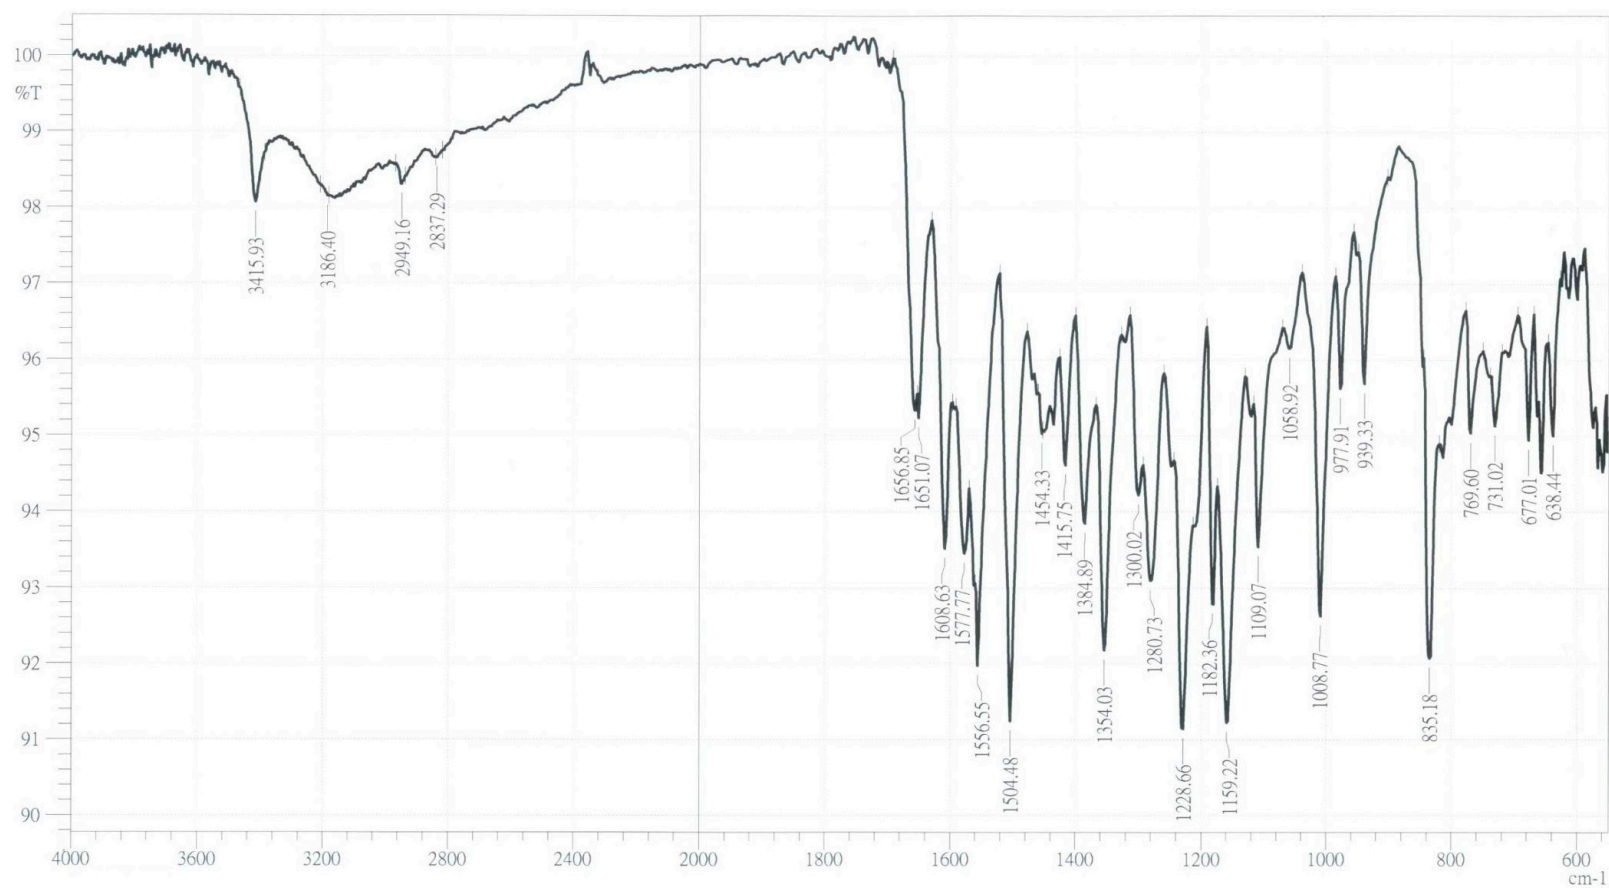

Figure S10. IR spectrum of FL5.

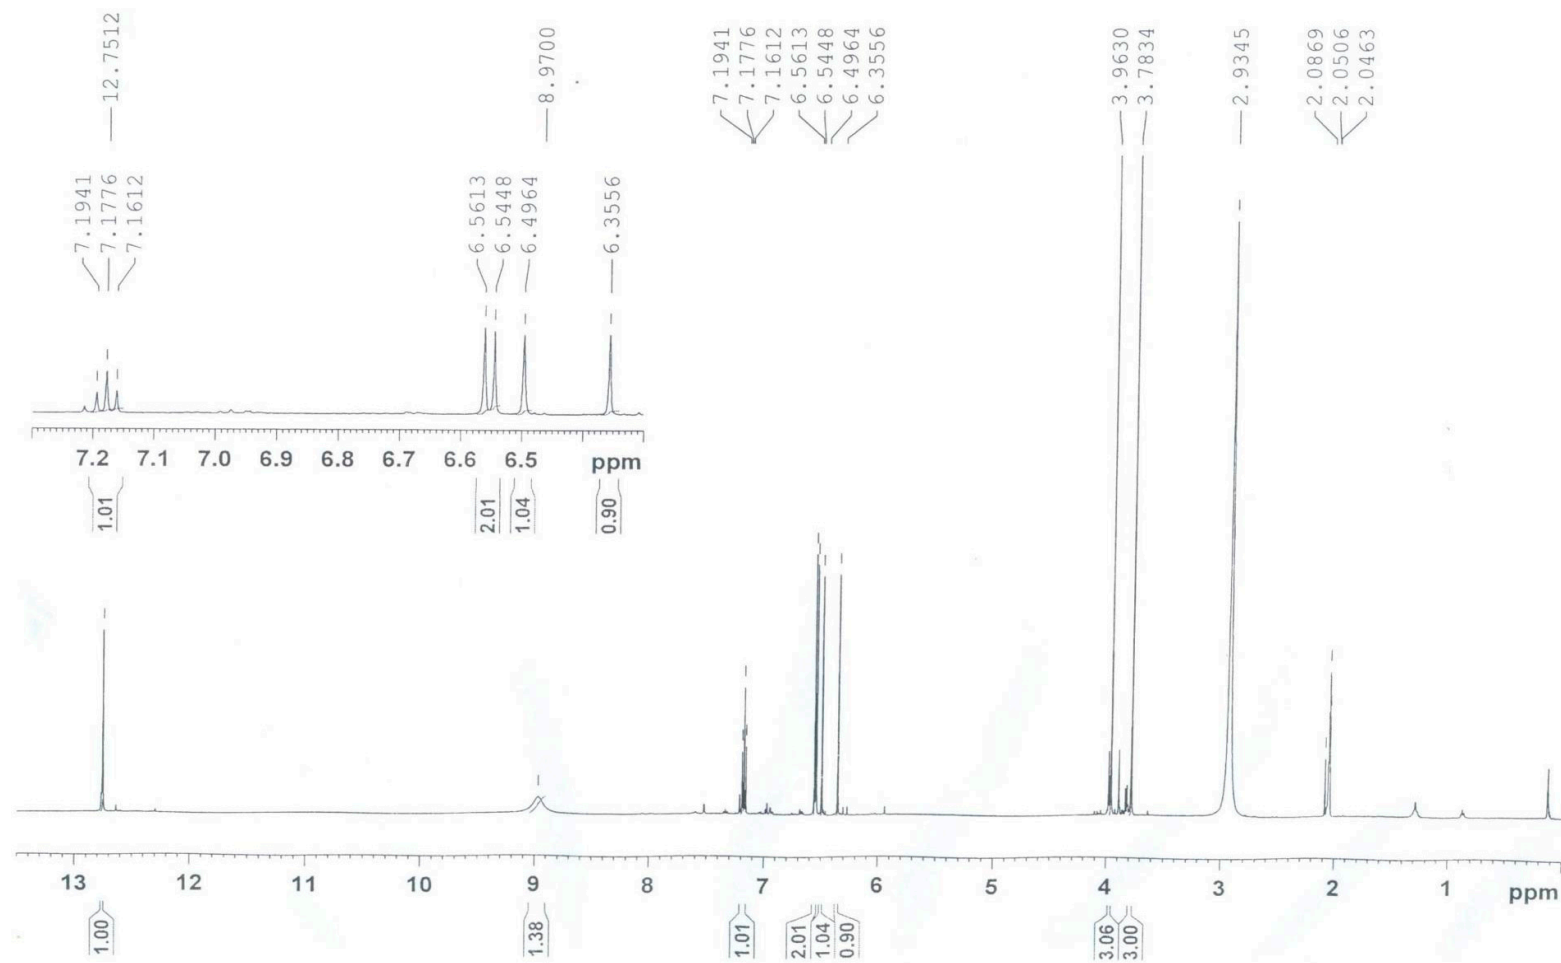

Figure S11. NMR spectrum of FL6.

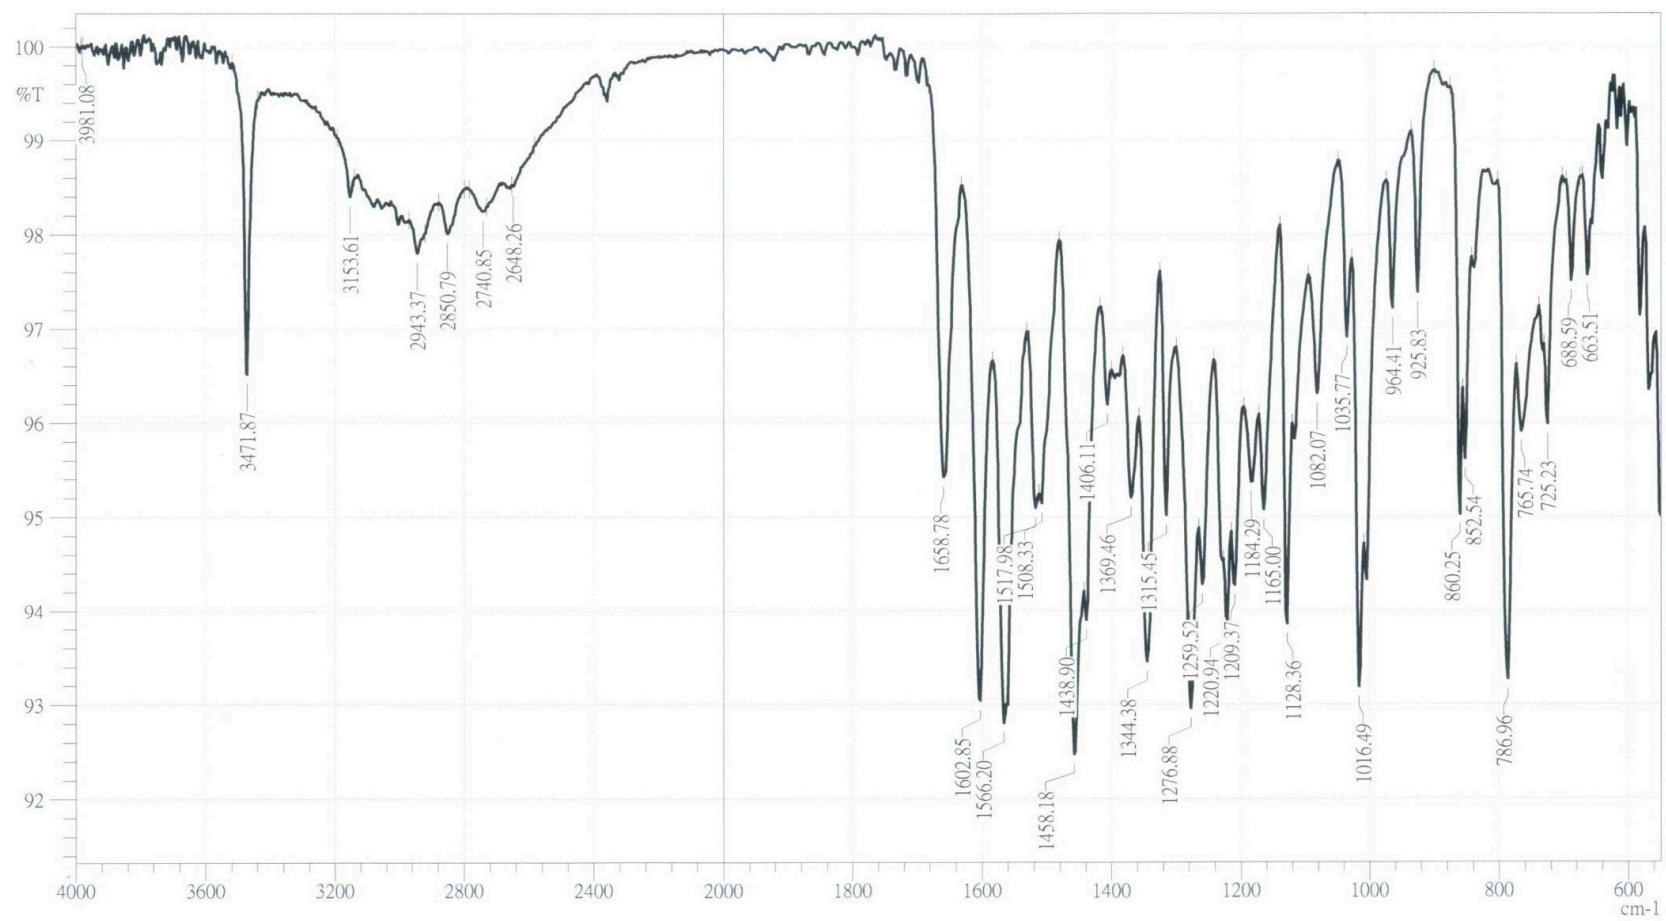

Figure S12. IR spectrum of FL6.

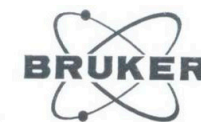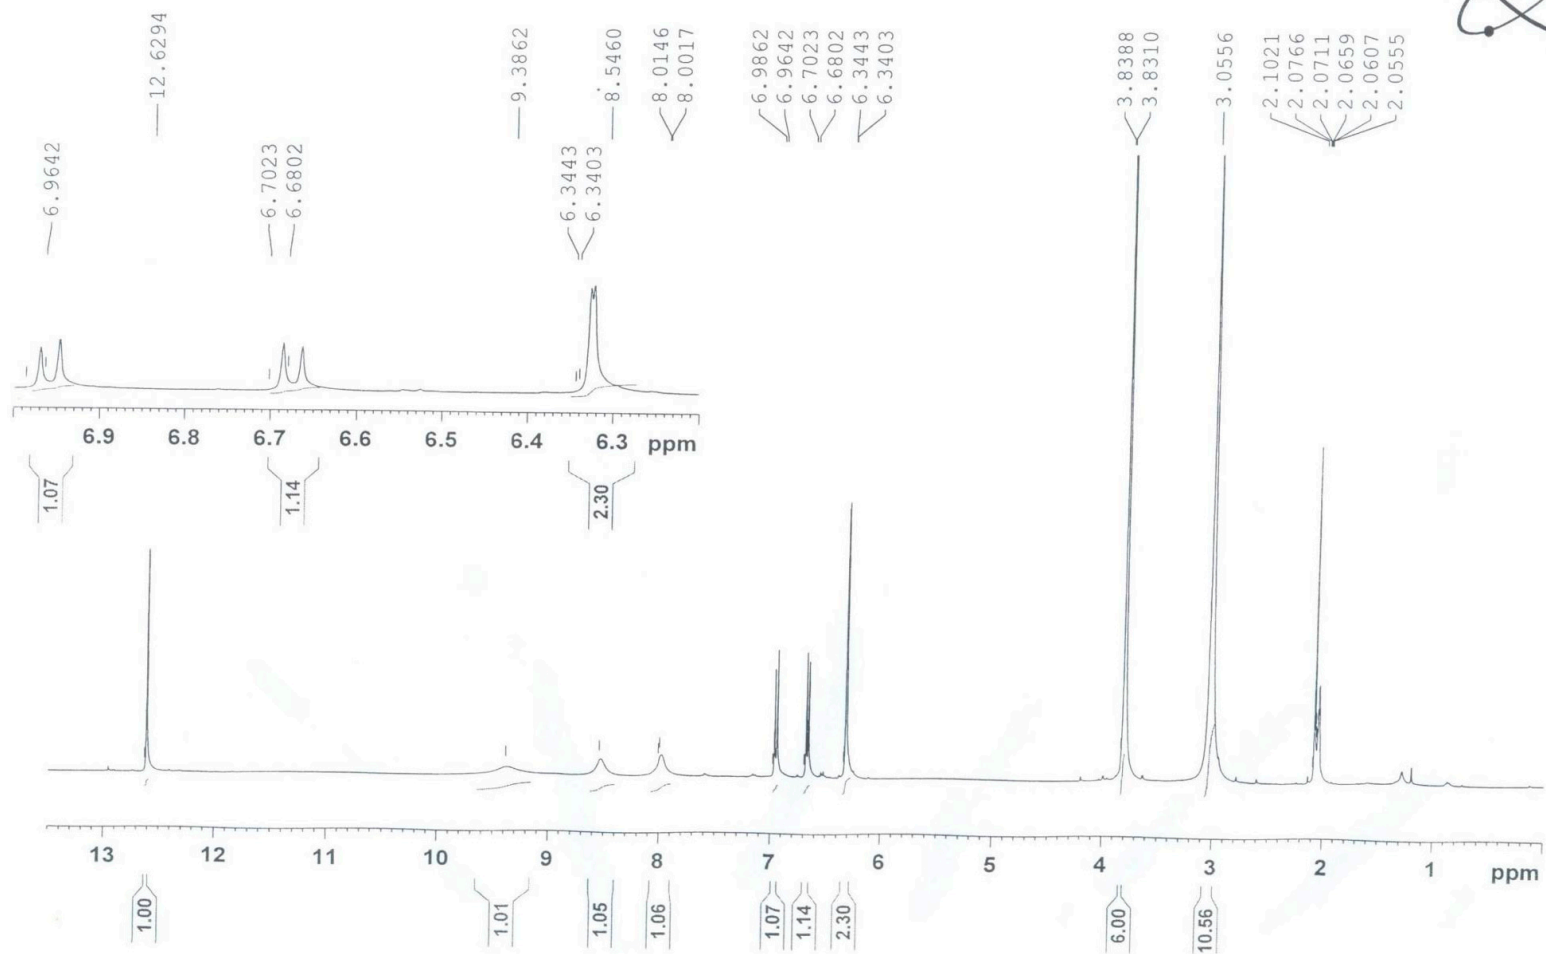

Figure S13. NMR spectrum of FL7.

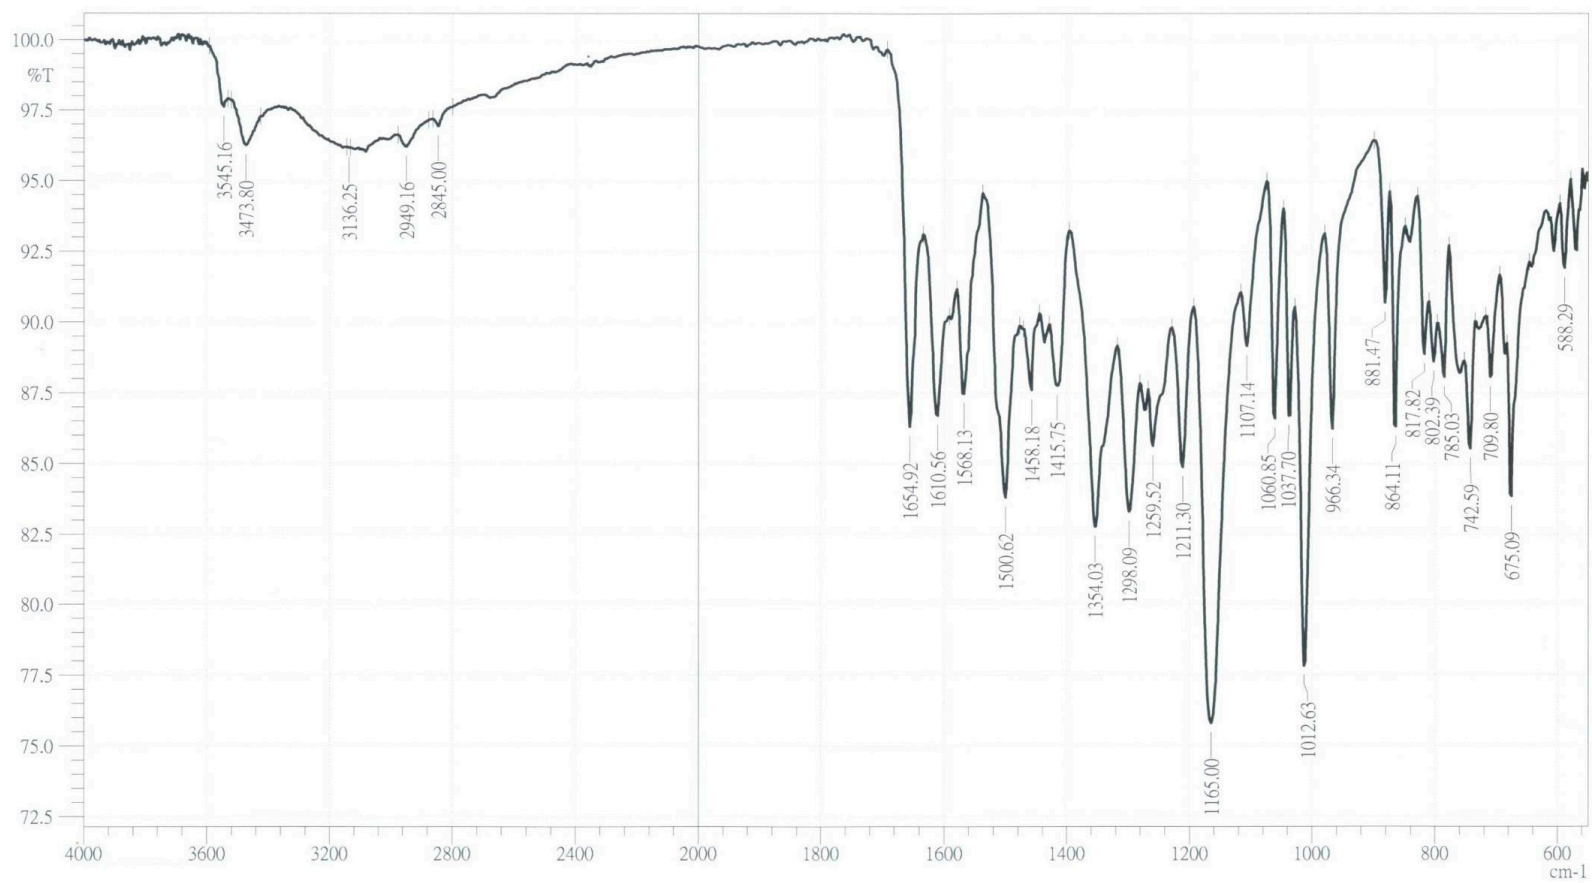

Figure S14. IR spectrum of FL7.
